# Supplementary material for: Structural basis of regioselective tryptophan dibromination by the single-component flavin-dependent halogenase AetF
Source: PubMed Central journal article supplement (PMC10306068; doi:10.1107/s2059798323004254), 2023-06-14
Supplement: d-79-00596-sup1.pdf [file d-79-00596-sup1.pdf]

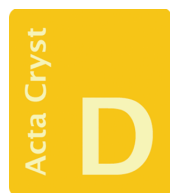

STRUCTURAL  
BIOLOGY

**Volume 79 (2023)**

**Supporting information for article:**

**Structural basis of regioselective tryptophan dibromination by the single-component flavin-dependent halogenase AetF**

**Simon Gäfe and Hartmut H. Niemann**

**Table S1** Pairwise *DALI* alignment of AetF against the *AlphaFold2* model of Bmp5 (top row) and *DALI* hits for AetF against the PDB90.

The *DALI* run against the PDB was performed on 01.03.2023. The structure of Bmp5 used in the pairwise alignment is AF-U6BHD3-F1-model\_v4.

| No.  | Protein                                                      | PDB  | Z    | rmsd | lali | nres | %id | reference                            |
|------|--------------------------------------------------------------|------|------|------|------|------|-----|--------------------------------------|
| n.a. | flavin-dependent phenol brominase (Bmp5)                     | n.a. | 27.6 | 3.5  | 438  | 515  | 16  | (Agarwal <i>et al.</i> , 2014)       |
| 1    | ancestral flavin-containing monooxygenase 2 (ancFMO2)        | 6sem | 25.9 | 3.6  | 432  | 530  | 14  | (Nicoll <i>et al.</i> , 2020)        |
| 2    | ancestral flavin-containing monooxygenase 5 (ancFMO5)        | 6sek | 25.6 | 3.1  | 426  | 504  | 15  | (Nicoll <i>et al.</i> , 2020)        |
| 3    | ancestral flavin-containing monooxygenase 3-6 (ancFMO3-6)    | 6se3 | 25.2 | 3.1  | 436  | 528  | 13  | (Nicoll <i>et al.</i> , 2020)        |
| 4    | ancestral flavin-containing monooxygenase 1 (ancFMO1)        | 7al4 | 20.8 | 3.2  | 437  | 524  | 14  | (Bailleul <i>et al.</i> , 2021)      |
| 5    | phenylacetone monooxygenase, a Baeyer-Villiger monooxygenase | 1w4x | 18.8 | 3.5  | 295  | 533  | 12  | (Malito <i>et al.</i> , 2004)        |
| 6    | protein with similarity to flavin-containing monooxygenases  | 1vqw | 18.6 | 3.2  | 321  | 442  | 13  | (Eswaramoorthy <i>et al.</i> , 2006) |
| 7    | pyrrolizidine alkaloid <i>N</i> -oxygenase ( <i>ZvPNO</i> )  | 5nmx | 18.3 | 3.3  | 321  | 409  | 13  | (Kubitza <i>et al.</i> , 2018)       |
| 8    | cyclohexanone monooxygenase                                  | 3gwd | 18.2 | 3.6  | 301  | 531  | 13  | (Mirza <i>et al.</i> , 2009)         |
| 9    | steroid monooxygenase                                        | 4aos | 18.2 | 3.5  | 297  | 532  | 14  | (Franceschini <i>et al.</i> , 2012)  |
| 10   | <i>S</i> -allyl-L-cysteine <i>S</i> -oxygenase               | 6wpu | 17.9 | 3.2  | 332  | 439  | 14  | (Valentino <i>et al.</i> , 2020)     |

**Table S2** Boundaries of the FAD-binding and NADP-binding domains shown in Fig. 2

| Protein             | FAD-binding domain | NADP-binding domain | reference                      |
|---------------------|--------------------|---------------------|--------------------------------|
| ActF                | 1-132, 327-441     | 133-176, 294-326    | this work                      |
| Bmp5                | 1-139, 324-432     | 140-199, 288-323    | this work                      |
| AncFMO2             | 1-154, 331-442     | 155-213, 296-330    | (Nicoll <i>et al.</i> , 2020)  |
| ZvPNO <sup>1)</sup> | 1-155 260-371      | 156-259             | this work                      |
|                     | 1-155, 260-425     | 156-259             | (Kubitza <i>et al.</i> , 2018) |

<sup>1)</sup> For ZvPNO the authors of the structure assigned the whole sequence either to the NADP- or to the FAD-binding domain. For Fig. 2, we defined the FAD-binding domain of ZvPNO based on structural elements conserved in the other three proteins. This leaves a short C-terminal extension (residues 372-425) as additional structural elements shown in light blue in Fig. 2.

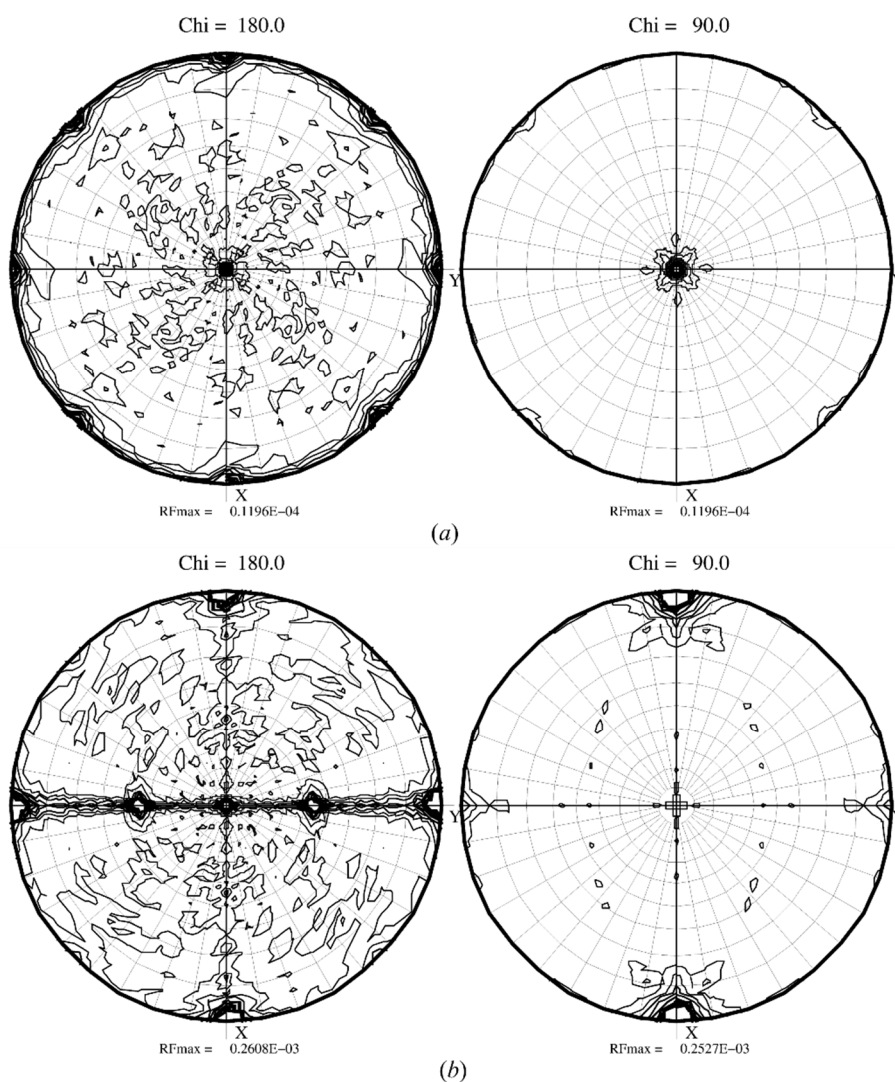

**Figure S1** Self-rotation functions for  $\chi=180^\circ$  and  $\chi=90^\circ$  showing the location of 2-fold and 4-fold axes. (a) Untwinned  $P4_3$  crystals (empty AetF). The short axis is the crystallographic 4-fold  $c$ -axis (b) Almost perfectly non-merohedrally twinned  $P2_12_12_1$  crystals. The short axis is the  $a$ -axis. A non-crystallographic  $4_3$ -axis lies parallel to  $a$  and the crystals are twinned by  $90^\circ$  rotation around  $a$ .



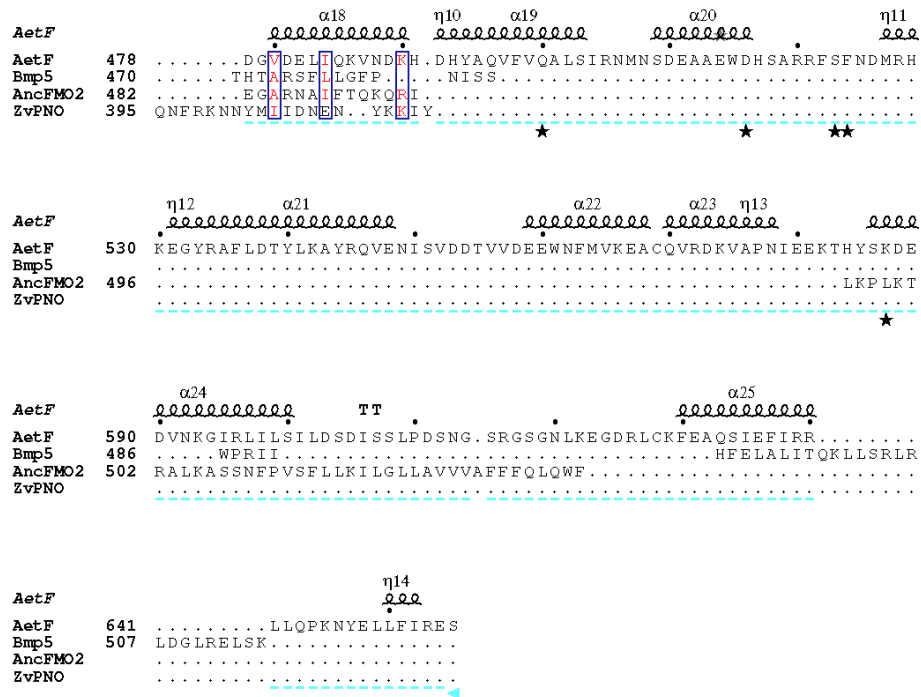

**Figure S2** Pairwise *DALI* alignment of AetF against Bmp5 (AF-U6BHD3-F1-model\_v4), AncFMO2 (6sf0 *B*) and ZvPNO (5nmx *A*). Missing structural elements were copied from the respective *AlphaFold2* models. Domains in AetF are marked by dashed lines and domain borders by arrows (same color code as in Fig. 2). Consensus sequences for dinucleotide binding (GXGXXG and GXGXXA) are marked by red triangles and residues involved in binding of Trp or 5-Br-Trp are indicated by black stars. The catalytic amino acids found in AetF (E200 and K258) are highlighted in magenta.

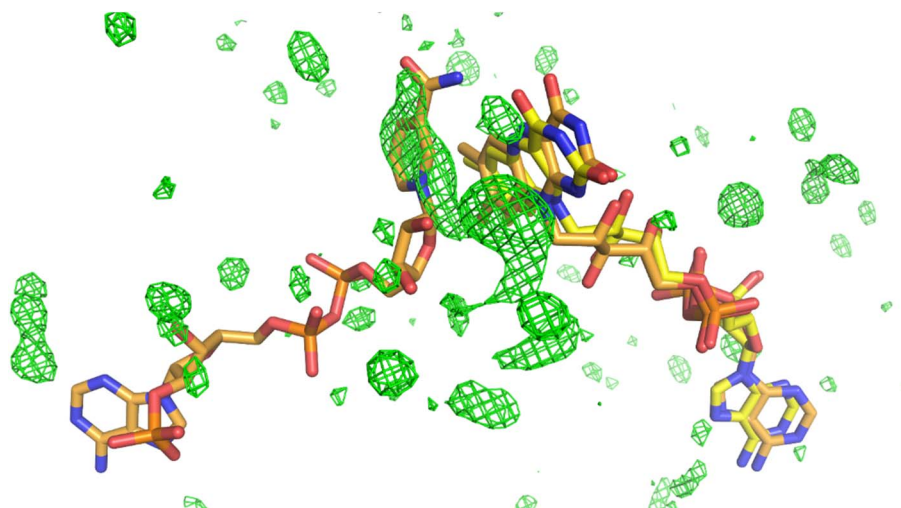

**Figure S3** Difference density ( $mF_o - DF_c$  density,  $3\sigma$ , green mesh) at the expected location of the NADP-binding site. The larger contiguous difference density near the FAD in AetF (yellow carbon atoms) could be interpreted by a nicotinamide riboside. For comparison, NADP and FAD from 6sf0 (light orange carbon atoms) are shown (structures superimposed on the FADs). The NADP in AetF would need to adopt a different binding pose compared to 6sf0 to fit the shown difference density.

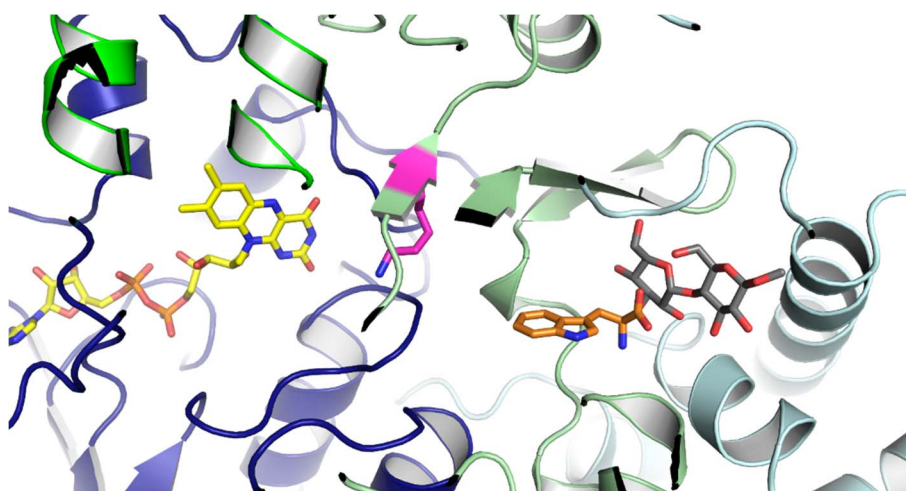

**Figure S4** Comparison of Trp binding in AetF and CYMAL6 in AncFMO2. Our structure for AetF–Trp (cartoon, domains coloured as in Fig. 2) and AncFMO2 (6sf0 *D*) were superimposed at the FADs. Both Trp (orange carbon atoms) and CYMAL6 (grey carbon atoms) bind to a similar site in the respective enzyme.

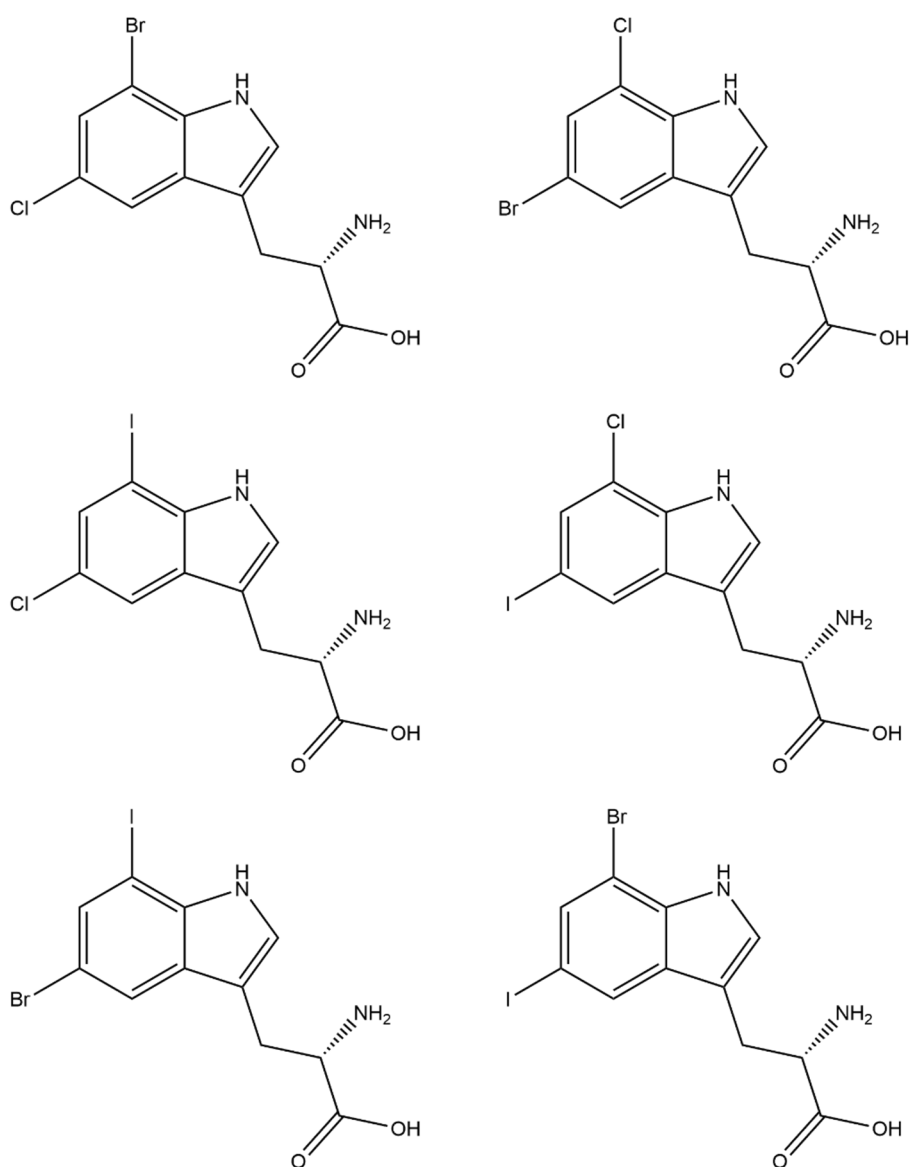

**Figure S5** Possible products of tryptophan halogenation with two different halogens. With prior use of a suitable two-component halogenase, a regioselective second halogenation by AetF should be possible. This would allow site-specific differential double halogenation of Trp.



```

AetF      1 .....MLEVCIIGFGFSATPLVREELARTQTEFQIIISAESG...SVWD
A0A847S906 1 .MEFKSISGNVAVSGFDVVVTIETLTVGGNFSAATPLVREELKFKGKAFITITADG.Y...SIWF
A0A7Y3H3Q0 .....
A0A653JLQ6 1 .....MAEPREIDVLIIVGGGFSTMLPIRELEASGIGWLMVSP.MQ...PIWE
A0A7T1HKU9 1 .....MIQPSLELELVLIIGLGFSSVPLIRELLERTGIDFRVVSAGEL...SVWD
A0A812V201 1 MSSLSMPKRFWLGARNRMECEVCVVGLGVSSLPPLKLLQQSSDFRVSSTAF...GIWE
A0A813L5C2 1 .....MAESGMVKCEVCIIGLGVSSLPPLVKELEKSGDYRVVSSDAF...GVWQ
A0A450T1N5 1 .....MGKSLCVIGAGFSGLTVMKQLLDQGHKVVCFERHHEIGGVFAK
A0A819HBQ7 1 .....MEKKKFAVIGGCVSCLYALKYLLEEKLDARLYERESN.LGGVWL
A0A4R5VFM9 1 .....MEKPVVVLVVGAGWAGLYAAKYARDAGLSVLIPEARDD.PGGVWN
A0A819HTX4 1 .....MEKKKFAVIGGCVSCLYALKYLLEEKLDARLYERESN.LGGVWL

```

```

AetF      40 RLSESG....RLDFSLVSSFQTSFYSDFLVRDY.....EK.D.YYPTAKQFYEMHDKRW
A0A847S906 56 RLEKSG....RLDFDLVSSKQSSMYSFELVNHED.....TK.D.VYPTSKEFLSFHRRKY
A0A7Y3H3Q0 .....
A0A653JLQ6 44 QLETAG....ALDFDISSITQSSVYSFELVFMIREQGFNFS.D.GFPPTAKEFFYGIHKKY
A0A7T1HKU9 46 RLEFRG....RLDFDISSYLTSTFYSDFLVQDF.....ET.D.FYPTAQFFAMHKRW
A0A812V201 58 KLTAAG....E.NFDLVTTIESTNYSWWD...Y.....DY.DFPFYTAGRYHDKLLAE
A0A813L5C2 47 KLDAAG....E.NFDLVTTIESTNYSWWS...Y.....DY.DFPFYTAKEYYAKLKAEE
A0A450T1N5 44 RN.....TYESCLLTISNLFMAYSDHM..PM.....NERI.KFQTRGEYCYLLHSY
A0A819HBQ7 44 .YKER..KGGVYQSTHEVTSKTYLHASDFP.LPD.....ET.P.HFKPHDQVLEYLHSY
A0A4R5VFM9 45 .YSDPPLITVMKNTVSSSRHVTEASDFS..MG.....KAAG.NFRHQDALRYLKDY
A0A819HTX4 44 .YKER..KGGVYQSTHEVTSKTYLHASDFP.LPD.....ET.P.HFKPHDQVLEYLHSY

```

```

AetF      87 RS..V.YEEKTIR.DFVTKIENF.KDYSLTSTRS.....GKT.YEAKHVVLATG..FDR.
A0A847S906 103 FA..T.YQRYFVK.DWTEVHNY.DDFSLVYTRS.....CKI.YRATHVMIATA..FRR.
A0A7Y3H3Q0 .....
A0A653JLQ6 97 AA..R.HADHIYN.GVVDSIDNH.ADHSIVHLES.....GEQ.LRAKVVVATA..FRR.
A0A7T1HKU9 93 RE..Q.HRRHLIR.DEVLRIDNF.ETHSLVHTAS.....GQL.LRARNVVVATG..YQR.
A0A812V201 102 LT..P.DLMDRWVR.KDVTVQDET.GGRYRVMSGD.....ELL.LTCSKLVHAIG..FAP.
A0A813L5C2 91 LT..F.SIMARKVTF.KAVGHITQCF.ATGYRVVESA.....GTLVSCSKLVHSIG..FSPD
A0A450T1N5 87 AEKFS.LTPHTFFNTIVEDIDKT.DDGATTKTTSMNGENPRT.YNFDGTVCTG..SFQK.
A0A819HBQ7 92 ANHFN.LWSHMHFEYDIKVDKGRDDHWKVTFRC..DGKEIK.EDFDGLVITIGQHQTA.
A0A4R5VFM9 95 ADRFD.LTSRIIVTQARVEQAEKQ.GDEWSVRTCD....GRS.FTARRIAVCTIG.VHQR.
A0A819HTX4 92 ANHFN.LWSHMHFEYDIKVDKGRDDHWKVTFRC..DGKEIK.EDFDGLVITIGQHQTA.

```

```

AetF      133 L.....MNTFLSN..F.DNE..VSN..KTFVFDTMGDSANLITAKLI.
A0A847S906 149 K.....IHDSITN..F.DFG.AATN..KTIIFETAYGDSANLIVSKLM.
A0A7Y3H3Q0 1 .....M.GDSANLITAKL.
A0A653JLQ6 180 R.....MNANLKQ..I.TVDESFAK.NVAVITSTCDSANLITAKLV.
A0A7T1HKU9 139 K.....VLSHLLD..T.DYS..VTG.QTILFDMICDSVNLIMISKLI.
A0A812V201 149 D.....KNIFSNLSCIA.NAG.RQGG.KHFLIFGFSDTNLYISRLLI.
A0A813L5C2 140 Q.....NLFSNLKVVA.AAA..GGG.KHFLVSGLSDTNLYISRLLI.
A0A450T1N5 142 AKYPNEIPGFETFGQDILHTAQYHNN..V.EPD..LTD.KRVLICIGMGESAADVTEIG.
A0A819HBQ7 147 N.DLHHVEPFDRFIFGTTSHSISY.KK..P.DDK.IHRD.KTILIVGGGETASDLAVELS.
A0A4R5VFM9 145 R...RPITGPVGNFQQRIRHAGDIKT..PGDLR..IGSKDHVVVYGGGETAADTVQDIAA
A0A819HTX4 147 N.DLHQVEPFDRFIFGTTSHSISY.KK..P.DDK.IHRD.KTILIVGGGETASDLAVELS.

```

```

AetF      168 PNNNKIILRT.NGFTALDQEVQV.L.....GKPFITDQLES.PNFR.YVSS..E.LYD.
A0A847S906 185 PGNNRVVLLT.NGFVCLDKLAFPE.E.....KDSYITDQLEBM.HNFR.YVSK..FIYK.
A0A7Y3H3Q0 14 PGNNNKIILRT.KGFDPLDKVFIPI.A.....GITFTDQLEBF.HNFR.YVSQ..EHYS.
A0A653JLQ6 180 AHGAKVHLVS.NCFIILDKMFAT.FSPFDD.GPRFVPIDQLECB.HNFR.EVSK..WSYR.
A0A7T1HKU9 174 AGGNRIILRC.GCFNPRDKVVP.I.G.....DRAFTDQLEBY.HNLR.YVSH..ELYS.
A0A812V201 188 HAGHRVTLAC.RHFFHVVDKIGSTHG.....NVGGPFDQYEP.....
A0A813L5C2 177 CAGNRVTVTC.QHFFVLDKIGT.H.....DNVGGPFDQYEPFHQHWADQTAP..NITG.
A0A450T1N5 195 DVAKRCILSMRRYCNVAFRNLPF.A.....DGYFTDATT.RLEFN.RVSG.WINS.
A0A819HBQ7 199 TVARRVYMSIRDQWFQESLFG.....DQPADILFP.KSFC.FFGLYNNILT.
A0A4R5VFM9 198 GLEAQITWAIARGQWFPRKVLRRPGQAPGHYDRHDMADLEYS.AILE.....LTVF
A0A819HTX4 199 TVARRVYMSIRDQWFQESLFG.....DQPADILFP.KSFC.FFGLYNNILT.

```

```

AetF      214 ....R..LMM..SPVYFPT.....VNPA.....VSY
A0A847S906 231 ....R..LIG..GGFNFSVMTLPKTVGKWFVFGF.....TLH
A0A7Y3H3Q0 60 ....S..IIT..C...KTD.....SNPF.....SLG
A0A653JLQ6 232 ....A..FID..CGYIHG.LIHRRAQLFDRN.....SLG
A0A7T1HKU9 220 ....S..FYE..ASF..TP.....DNPA.....LLG
A0A812V201 223 ....MQHWT..CSGTVPNVTGILVPLP.IQCARTGSPMWMAGQITSYVAELVGLQDVVDL
A0A813L5C2 226 ....I..LVP..LP.IRGA.....KVGSEPNWLM.....GKVQSYVSDRVGLKEVVDLRKFD
A0A450T1N5 242 ....F..WHT..NL.FRKQ.....KNSID.....PAIALR
A0A819HBQ7 244 ....K..IGWTLFIRP.....F.....WGE
A0A4R5VFM9 250 EEGKP..GMR..YRCN.....LATSGSVF.....SYQ
A0A819HTX4 240 ....NILTKI..GW.TLFI.....RPF.....WGE

```

```

AetF      232  N..Q.....F.PLI..R..R...D..FSWV..DSKSSPPNGL..IAIYWPIDQYYYYHFN
AOA847S906 258  V..K.....Y.PMA..N..RNWKL..AKELGWDATSPVFNQY..IIVIKYWPIDAYQRLYD
AOA7Y3H3Q0  75  T..Q.....F.PSS..V..R...D..MSHI..TTKSTPSSGT..IIVIKYWPVLDYAKAEFG
AOA653JLQ6 258  V..R.....H.PKS..I..R...PHKDIRHFFKAKAPVENGH..IAIYWPIDVYKLYGE
AOA7T1HKU9 236  S..Q.....F.PAI..V..R...D..NRKA..GAAASPHSGS..VAIKYWPVVDAYSASFQ
AOA812V201 276  R..QEDTEYQ.EAGRGL.V...N..PA....NVDVPGGLG..YLVYQWPFVDEYARFYD
AOA813L5C2 268  T..E.....VQYCA..QGLV...D..FAKT.....EVPGLGLLVQWPFVDEYAKYYN
AOA450T1N5 263  G..E.....W....CLK..A...G..N.....EPNQ..VITNE.....
AOA819HBQ7 258  GGTG.....I.AEW..K..P...R..C.....QLFHG..FINKSR.....
AOA4R5VFM9 273  .GHG.....V.AEW..V..N...D..IP.....WFRQ..FINKSR.....
AOA819HTX4 258  GGTG.....I.AEW..K..P...R..C.....QLFHG..FINKSR.....

```

```

AetF      271  D..D..LENYISKGYLLNDIAMWHTGKVLVLPVS.D.TIPINFDKKTIY..AGIERSFTQ
AOA847S906 302  D..GQ..LEQHIEDGYLLNDIIGYFVEQGVLDLWSKSQ..TTIDTDTRTKW..GDKIVQYDA
AOA7Y3H3Q0 114  D..N..LEENIAKGYLLNDIAMWIKTGKVLVPP.E.SKIDFDKKTISY..GIERSFYQ
AOA653JLQ6 301  E..T..LEQKIADGYLLNDLIPFFEHGHVKLWDKAA..TTIDHEAMTISE..DGENASFD
AOA7T1HKU9 275  H..R..LEEAIIEGYLLNDIALWHTGRVVVPR.E.TPVDLEARVVEH..DGLEIPFDE
AOA812V201 319  D..DRYRDWMLKEGVYLLNDIYFFFQOGLVSLHPR.SDVVEHT.AEKRYRV..RGEEVEFDE
AOA813L5C2 307  DPSF..QEWMLKSGVYLLNDIYFFFQOGLVSLHPR.SDVVEHT.AEKRYRV..RGEEVEFDE
AOA450T1N5 282  .....RIFNSIIDGKVPNTV.G.IEKIT.ENSVLV..KCGVQEEEDT
AOA819HBQ7 281  .....GVVNVKVASGMVIPKRO.I.NSIK..EQLVTFDNEKPVHIDE
AOA4R5VFM9 295  .....HALEHVWNRVTPARG.I.CACD..GRTVTF.EDGRTCAQTE
AOA819HTX4 281  .....GVVNVKVASGMVIPKRO.I.NSIK..EQLVTFDNEKPVHIDE

```

```

AetF      323  YVKGDAEQPRLPILILING...ETPFE...Y.LYRDIEMGVIPQRLN.NIYFLGYTRPFTG
AOA847S906 356  LLEGDREMPNLPILISKRSKSGMDKPYE..Y.VYRDNFMGIAPRELK.NIYLVGYTRPFTG
AOA7Y3H3Q0 166  YVTGDAEKPKLPPIMING...DTPFE..Y.KYRENFMGVIPKRLN.NIYLVGYTRPFTG
AOA653JLQ6 354  IIDGDQETPAVPEIRAH.GESGVEVFA..Y.KPREQFMGVTPSPGLR.NIYTIIGFTRPFTG
AOA7T1HKU9 327  RFSGDAEQPRLPILIDG...TTPYT..Y.RYRDNFMGVLPKDLQ.RIQGP.....
AOA812V201 373  VINCDEAKHKTLSMPFF.....CFN..Y.SYDTEIFGTWGRKHP.NIYFLGTTRPFTG
AOA813L5C2 361  VLGCCCEAKHKLLEVRG.....CRP..F.TYSEELYGIVWRIHP.NIYFLGTTRPFTG
AOA450T1N5 320  IMCCTGFRMAFFFLK.....NEYS..FTNPRLLYKHMHPLELCKKIVFAFVTRPFTG
AOA819HBQ7 319  ILPCTGYRWFHSPFN.....DNFRKKT.KIECLYQLIFPVNLP.NIYLVGYTRPFTG
AOA4R5VFM9 332  VICCFGYEGDVSLP.....EBLLR.RV.PTDKLYRLVHPDDP.SLSFFGFARPTL
AOA819HTX4 319  ILPCTGYRWFHSPFN.....DNFRKKT.KIECLYQLIFPVNLP.NIYLVGYTRPFTG

```

```

AetF      375  GLANITEMQSLFTHKLLITQPQFHQKTHQ..N..LSKRITAYNQHYHYGA.AKPRKHDHVP
AOA847S906 412  GLNNIITEMQCLFVHRMIIIDKSFNDSIYQ..N..IEERI.KQYDIEYYGT.AEKRLIDHVP
AOA7Y3H3Q0 218  GVANISEMQSIFTHKLLITQPFLRDIYR..N..LEERI.DNYNKHYHYGS.TPPKTDHSHVY
AOA653JLQ6 409  GLNNIITEMQCLLVHRMIIADPDRNSIRT..N..IDQRIADYNATYYTK.RPEKTDHSHVY
AOA7T1HKU9 371  .....AAEP.....
AOA812V201 421  AFGCTAEVNAMFVHRMIIITESKFHGQLV.R..Q..FPGLMHSQRVSHYVQ.ATEPDKMHVHW
AOA813L5C2 409  AFGCVSELSSLFVHRMIIITNSFFQDFISK..Q..FPSLMHRQRVTHHAS.VSDPKLHVQW
AOA450T1N5 370  GVPVIAEMQGRYLALLY.NDDV..SLPPEDQ..LPALIQADKSESEREFYITPVVTSLVN
AOA819HBQ7 369  SIFSLAELQARRVAQVFS.GRDC..LPS..PTNMSIWLQKYWKRHAQZYPPFGRLQQLVN
AOA4R5VFM9 381  SIFSLAELQARRVAQVFS.GRDC..LPS..PTNMSIWLQKYWKRHAQZYPPFGRLQQLVN
AOA819HTX4 369  SIFSLAELQARRVAQVFS.GRDC..LPS..PTNMSIWLQKYWKRHAQZYPPFGRLQQLVN

```

```

AetF      430  FGFVTEDELARLIGIHY...QPNE.....CR...S.VRDLLFYAFPNNAFKYRLKGEY.
AOA847S906 467  YGFVTHDLAKLIGIAG...SAFT.....GR...S.LKDIKRYLFPNNAFKYRQEGKY.
AOA7Y3H3Q0 273  YGFVTHDLAKLIGIAG...SAFT.....GR...S.LKDIKRYLFPNNAFKYRQEGKY.
AOA653JLQ6 464  YGTFDEVAKLDIRP...ARAD...MP...G.KKGLMRYMFPNNAFKYRQEGKY.
AOA7T1HKU9 375  .....LSRA.....
AOA812V201 476  AGMHCLWLSRVIGCDI...TFSE...AFN...R.G.MVLEWMTGPIINALRCITGPHY.
AOA813L5C2 464  AGMHCLRTAKLIGCSL...SYRE...AGR...L.G.LRVEQQTCPINALRCITGPHY.
AOA450T1N5 425  YSHYMESLGRIGCSL...E.VS...WF...KDFKLASKIWLGPFAIQYRLNGPQ.
AOA819HBQ7 424  QPEYSDFLANQLKVKP...RLWK...LFFSQP.OKWYTIYFQSPWTFPFLFRMNALET
AOA4R5VFM9 436  PFNYLTLVMAALGKEKTLRALFRFNPFN...W.QEFSRII.RVPLSPFLFRMNALET
AOA819HTX4 424  QPEYSDFLANQLKVKP...RLWK...LFFSQP.OKWYTIYFQSPWTFPFLFRMNALET

```

```

AetF      476  .AVD..GVDELIQVNDKHDH.YAQQ.....FV.QAL.SIR.N..M....
AOA847S906 513  .KVD..GVKEMVEKIQWQHS.G.FSLM.....KH.YIL.NYL.L..M....
AOA7Y3H3Q0 319  .AVE..GDKVVEKINKQYKD.FMAI.....FA.YVL.TSNTR..M....
AOA653JLQ6 510  .AVD..GVQDLIEHTSKQYHD.YKVL.....AL.LVI.RYP.F..F....
AOA7T1HKU9 522  .AVP..GACDKYKASCQKIG..TSYM.....FL.....
AOA812V201 510  .ALP..GAAARYKRSCCKTN..TSFM.....SL.NMI.LYRN.W..GDRMVV
AOA813L5C2 471  .AFKEEDQKEIRHFLRTPP...LYF.....PKSTYA.LLI.G....
AOA450T1N5 474  NDEK..LAYSRRHLKCI.PRRDQ.....
AOA819HBQ7 488  .SDHGPDARLRMEEYI.....SPMPFGFRDPGASLLRYVM.FYVLAIG.VPRL....
AOA4R5VFM9 488  .SDHGPDARLRMEEYI.....SPMPFGFRDPGASLLRYVM.FYVLAIG.VPRL....
AOA819HTX4 488  .SDHGPDARLRMEEYI.....SPMPFGFRDPGASLLRYVM.FYVLAIG.VPRL....

```



```
AetF
AOA847S906
AOA7Y3H3Q0
AOA653JLQ6
AOA7T1HKU9
AOA812V201
AOA813L5C2
AOA450T1N5
AOA819HBQ7
AOA4R5VFM9
AOA819HTX4
546 VSWFVALCCSAGFAWLKMSVEVEKLAFFAVFLYLLTKATLLSQWRGVVLMALAFDNLVHKRA
```

```
AetF
AOA847S906
AOA7Y3H3Q0
AOA653JLQ6
AOA7T1HKU9
AOA812V201
AOA813L5C2
AOA450T1N5
AOA819HBQ7
AOA4R5VFM9
AOA819HTX4
508 .....N.....
545 .....QVNILAFICLLPMSVFIRKVPISLLEFLYN.....
352 .....M.....
542 .....ELLALATILLAPVPPVWVKIPA.....
606 WIMLLSNVCQLVFNICIFLHGTTYDVPDLLVRLGLPVDVIF.....
534 .....L.....
```

```
AetF
AOA847S906
AOA7Y3H3Q0
AOA653JLQ6
AOA7T1HKU9
AOA812V201
AOA813L5C2
AOA450T1N5
AOA819HBQ7
AOA4R5VFM9
AOA819HTX4
509 .....SDEAAEWDISA.....
573 .....PFIVLVVALAT.....NLHRYLNLFIVCAMVATCFYPGPLI
353 .....GEDRSDWLKQQ.....
563 AIITHNRLPFTSTLVGKFGLPPTRESKAIFNYRKAISFPVLAYPLVAAATWAAAGTDAAFAP
646 .....LVIGRTSY.PR.....
535 .....AL.DTLFD.....
```

★

```
AetF
AOA847S906
AOA7Y3H3Q0
AOA653JLQ6
AOA7T1HKU9
AOA812V201
AOA813L5C2
AOA450T1N5
AOA819HBQ7
AOA4R5VFM9
AOA819HTX4
520 .....RRFSFNDRHKEG..YRAFLD.TYLKAYRQVENI.....
609 PGLSLLAVFVTIFIGRKAGITRIPFNDLKNKSK..YHDEFFK.RYSEAFNRVAERKKSTAV
364 .....KRAFFNDRPKDA..YNSEVE.KYFKAFRKVKNL.....
623 SAGLLAYVYAMIHLGTAKGWNRRKFFCDMKSRRSPEMVRFFE.KYRAAPGRVKGTALNET
379 .....HPALHRRPGQHRRDAEPAGAQAADRQRGVPA
656 .....AFF..GDMRVRKP..YAKWLFNTYLP.....
```

★★

```
AetF
AOA847S906
AOA7Y3H3Q0
AOA653JLQ6
AOA7T1HKU9
AOA812V201
AOA813L5C2
AOA450T1N5
AOA819HBQ7
AOA4R5VFM9
AOA819HTX4
551 .....SVDDTVVDE..EWNFMVKEACQVRDKVAPNIEEKTHYSKDEDVNGKIRLILS
666 ANAVLTEE.....
395 .....NQVED..IFDE..EWNQLVKIAGKTRDEVIKETEDLGTPKWSEEIHAADLVRS
682 P.....
410 HHRQSGGADRRRLQPPLL..R.....
678 .....RSAKPTSGGP.....
542 .....RIARRRTARQ.....
```

★

```
AetF
AOA847S906
AOA7Y3H3Q0
AOA653JLQ6
AOA7T1HKU9
AOA812V201
AOA813L5C2
AOA450T1N5
AOA819HBQ7
AOA4R5VFM9
AOA819HTX4
601 ILDSDISSLPDSNGSRGSGNLKEGDRDLCKFEAQSIIEFIRRLQPKN.....YE
445 LAVN...DLGA.....ISDQSIKFEHEHFKLLASMKDFQE.....YD
545 .....NMIYRTWG.....DR
502 .....GWILGTLFFPIQKFRKRP..
552 .....GRSLAPRPAAMEFARAASS.....PF
```

```

AetF      649  .....LLFIRES.....
A0A847S906 .....
A0A7Y3H3Q0 479  .....MPYLKTAQFVEV
A0A653JLQ6 .....
A0A7T1HKU9 .....
A0A812V201 555  .....
A0A813L5C2 .....
A0A450T1N5 .....
A0A819HBQ7 .....
A0A4R5VFM9 573  GSSPAE.....
A0A819HTX4 .....

```

**Figure S6** (Including previous pages) Pairwise *DALI* alignment of AetF against *AlphaFold2*

models of the top ten hits containing a lysine at the position equivalent to the catalytic lysine in AetF (K258) found in a *Foldseek* search against the *AlphaFold/Uniprot50 v4 database*. The missing loop (609 – 628) in AetF (8cjd *A*) was copied from the *AlphaFold2* model. Domains in AetF are marked by dashed lines and domain borders by arrows (same color code as in Fig. 2). Consensus sequences for dinucleotide binding (GXGXXG and GXGXXA) are marked by red triangles and residues involved in the binding of Trp or 5-Br-Trp are indicated by black stars. The catalytic amino acids found in AetF (E200 and K258) are highlighted in magenta.
